# Supplementary material
Source: PubMed Central journal article supplement (PMC7863649)

## Supplemental material

### Table of Content

- Page 2. Supplemental Table 1. Correlation of the urine-to-plasma urea ratio with clinical variables of ADPKD patients from the DIPAK cohort.
- Page 3. Supplemental Table 2. Associations of baseline urine-to-plasma urea ratio with rate of kidney function decline during follow-up in ADPKD patients from the DIPAK cohort (n=583)
- Page 4. Supplemental Table 3. Sensitivity analysis. Associations of baseline urine-to-plasma urea ratio corrected for plasma creatinine, with rate of kidney function decline during follow-up in ADPKD patients from the DIPAK cohort.
- Page 5. Supplemental Table 4. Baseline characteristics of the DIPAK cohort used for Cox regression analyses, both overall as well as divided into tertiles of the urine-to-plasma urea ratio.
- Page 6. Supplemental Table 5. Predictive value of the urine-to-plasma urea (UPU) ratio as continuous variable and divided into tertiles for end-stage renal disease.
- Page 8. Supplemental Figure 1. Kidney function slopes of DIPAK cohort participants (n = 583) divided into risk groups according to Mayo htTKV class score (panel A), *PKD* mutation score (panel B) and UPU ratio score (panel C).

**Supplemental Table 1.** Correlation of urine-to-plasma urea ratio with clinical variables of the ADPKD patients from the DIPAK cohort (n=583)

|                                      | R     | p-value |
|--------------------------------------|-------|---------|
| Age (years)                          | -0.40 | <0.001  |
| Sex, female                          | 0.06  | 0.16    |
| Body Mass Index (kg/m <sup>2</sup> ) | 0.03  | 0.46    |
| Systolic BP (mmHg)                   | -0.12 | 0.004   |
| Diastolic BP (mmHg)                  | -0.13 | 0.002   |
| Antihypertensive therapy (% yes)     | -0.31 | <0.001  |
| Diuretics (% yes)                    | -0.23 | <0.001  |
| <i>PKD</i> mutation                  |       |         |
| <i>PKD1</i> T                        | -0.01 | 0.83    |
| <i>PKD1</i> NT                       | 0.009 | 0.86    |
| htTKV (mL/m)                         | -0.33 | <0.001  |
| Mayo htTKV class                     |       |         |
| 1B + 1C                              | 0.05  | 0.51    |
| 1D + 1E                              | -0.07 | 0.36    |
| eGFR (mL/min/1.73m <sup>2</sup> )    | 0.66  | <0.001  |
| 24h urine volume (L)                 | -0.31 | <0.001  |
| Estimated protein intake (g/24h)     | 0.10  | 0.02    |
| Estimated salt intake (g/24h)        | 0.05  | 0.27    |

Assessed with use of Pearson's correlation statistics. Data logarithmically transformed if appropriate. Reference groups are *PKD2* and others (non-*PKD1* mutations) combined, and Mayo htTKV class 2 and 1A combined. Abbreviations: BP, blood pressure; eGFR, estimated glomerular filtration rate; htTKV, height adjusted total kidney volume; T, truncating, NT, non-truncating. Protein intake was estimated in grams with the following formula: (urine urea excretion in mmol per 24 hours x 0.4667 x 0.06 +(0.031 x weight)) x 6.25. Salt intake was estimated with the following equation: sodium excretion in mol x (sum of molecular mass of sodium and chloride in g/mol).

**Supplemental Table 2.** Associations of baseline urine-to-plasma urea ratio with rate of kidney function decline during follow-up in ADPKD patients from the DIPAK cohort (n=583)

|                                          | Model 1<br>n=583 |         | Model 2<br>n=583 |         | Model 3<br>n=573 |         | Model 4<br>n=538 |         |
|------------------------------------------|------------------|---------|------------------|---------|------------------|---------|------------------|---------|
|                                          | $\beta$          | p-value | B                | p-value | $\beta$          | p-value | $\beta$          | p-value |
| Urine-to-plasma urea ratio (per 1 unit)  | 0.97             | <0.001  | 0.71             | 0.005   | 0.64             | 0.01    | 0.57             | 0.02    |
| Age (per 10 year)                        | 0.34             | 0.001   | 0.44             | <0.001  | 0.28             | 0.03    | -0.04            | 0.76    |
| Sex (female vs. male)                    | 0.59             | 0.003   | 0.57             | 0.006   | 0.67             | 0.001   | 0.43             | 0.04    |
| eGFR (per 10 mL/min/1.73m <sup>2</sup> ) |                  |         | 0.12             | 0.07    | 0.11             | 0.10    | 0.03             | 0.66    |
| <i>PKD</i> mutation                      |                  |         |                  |         |                  |         |                  |         |
| <i>PKD1</i> T                            |                  |         |                  |         | -1.05            | <0.001  | -0.90            | 0.001   |
| <i>PKD1</i> NT                           |                  |         |                  |         | -0.81            | 0.002   | -0.79            | 0.004   |
| Mayo htTKV class                         |                  |         |                  |         |                  |         |                  |         |
| 1B+C                                     |                  |         |                  |         |                  |         | -0.59            | 0.13    |
| 1D+E                                     |                  |         |                  |         |                  |         | -1.77            | <0.001  |

Associations tested with mixed model analysis. Urine-to-plasma urea ratio was ln transformed to attain normal distribution. Reference groups are PKD2 and other (non-PKD1 mutations) combined, and Mayo htTKV class 2 and 1A combined. Abbreviations; eGFR, estimated glomerular filtration rate; htTKV, height adjusted total kidney volume; NT, non-truncating; T, truncating.

**Supplemental Table 3.** Sensitivity analysis. Associations of baseline urine-to-plasma urea ratio corrected for plasma creatinine, with subsequent rate of kidney function decline in ADPKD patients from the DIPAK cohort (n=583)

|                                           | <b>Model 1</b><br>n=583 |         | <b>Model 2</b><br>n=583 |         | <b>Model 3</b><br>n=573 |         | <b>Model 4</b><br>n=538 |         |
|-------------------------------------------|-------------------------|---------|-------------------------|---------|-------------------------|---------|-------------------------|---------|
|                                           | $\beta$                 | p-value | $\beta$                 | p-value | $\beta$                 | p-value | $\beta$                 | p-value |
| Urine-to-plasma urea ratio (per 10 mg/dL) | 0.33                    | <0.001  | 0.28                    | <0.001  | 0.26                    | 0.001   | 0.23                    | 0.003   |
| Age (per 10 year)                         | 0.24                    | 0.02    | 0.50                    | <0.001  | 0.33                    | 0.01    | 0.01                    | 0.94    |
| Sex (female vs. male)                     | 0.90                    | <0.001  | 0.77                    | 0.001   | 0.87                    | <0.001  | 0.61                    | 0.007   |
| eGFR (per 10 mL/min/1.73m <sup>2</sup> )  |                         |         | 0.21                    | <0.001  | 0.19                    | 0.001   | 0.10                    | 0.10    |
| <i>PKD</i> mutation                       |                         |         |                         |         |                         |         |                         |         |
| <i>PKD1</i> T                             |                         |         |                         |         | -1.02                   | <0.001  | -0.87                   | 0.001   |
| <i>PKD1</i> NT                            |                         |         |                         |         | -0.78                   | 0.003   | -0.76                   | 0.005   |
| Mayo htTKV class                          |                         |         |                         |         |                         |         |                         |         |
| 1B+C                                      |                         |         |                         |         |                         |         | -0.59                   | 0.12    |
| 1D+E                                      |                         |         |                         |         |                         |         | -1.74                   | <0.001  |

Associations tested with mixed model analysis. In these analyses, the urine-to-plasma urea ratio was not ln transformed. Reference groups are *PKD2* and others (non-*PKD1* mutations) combined, and Mayo htTKV class 2 and 1A combined. Abbreviations; eGFR, estimated glomerular filtration rate; htTKV, height adjusted total kidney volume; NT, non-truncating; T, truncating.

**Supplemental Table 4.** Baseline characteristics of the DIPAK cohort used for Cox regression analyses, both overall as well as divided into tertiles of the urine-to-plasma urea ratio (n=706)

|                                      | <b>overall</b>        | <b>T1</b><br><b>&lt; 19.7</b>      | <b>T2</b><br><b>19.7 – 31.6</b>    | <b>T3</b><br><b>&gt;31.6</b> | p-value |
|--------------------------------------|-----------------------|------------------------------------|------------------------------------|------------------------------|---------|
| Number                               | 706                   | 236                                | 235                                | 235                          |         |
| Age (years)                          | 47 ± 11               | 52 ± 9 <sup>B</sup>                | 48 ± 8.9 <sup>B</sup>              | 41 ± 12                      | <0.001  |
| Sex, male (%)                        | 41                    | 43                                 | 44                                 | 35                           | 0.12    |
| Body Mass Index (kg/m <sup>2</sup> ) | 26 ± 4.5              | 26 ± 4.0                           | 27 ± 4.4                           | 26 ± 5.0                     | 0.39    |
| Systolic BP (mmHg)                   | 131 ± 14              | 132 ± 14 <sup>A</sup>              | 132 ± 14 <sup>A</sup>              | 129 ± 12                     | 0.009   |
| Diastolic BP(mmHg)                   | 81 ± 9.4              | 81 ± 9.6 <sup>A</sup>              | 82 ± 9.2 <sup>A</sup>              | 79 ± 9.2                     | 0.02    |
| Antihypertensive therapy (% yes)     | 76                    | 87 <sup>B</sup>                    | 80 <sup>B</sup>                    | 60                           | <0.001  |
| Diuretics (% yes)                    | 26                    | 34 <sup>B</sup>                    | 31 <sup>B</sup>                    | 13                           | <0.001  |
| <i>PKD</i> mutation (%)              |                       |                                    |                                    |                              |         |
| <i>PKD1</i> T                        | 43                    | 44                                 | 45                                 | 41                           | 0.86    |
| <i>PKD1</i> NT                       | 25                    | 25                                 | 25                                 | 25                           |         |
| <i>PKD2</i>                          | 22                    | 21                                 | 24                                 | 21                           |         |
| Other                                | 7                     | 8                                  | 6                                  | 9                            |         |
| htTKV (mL/m)                         | 913<br>[553 – 1357]   | 1105 <sup>B</sup><br>[709 – 1741]  | 1006 <sup>B</sup><br>[649 – 1478]  | 672<br>[427 – 956]           | <0.001  |
| Mayo htTKV class (%)                 |                       |                                    |                                    |                              |         |
| 1A                                   | 5                     | 3                                  | 5                                  | 6                            | 0.02    |
| 1B                                   | 19                    | 14                                 | 18                                 | 24                           |         |
| 1C                                   | 33                    | 32                                 | 33                                 | 32                           |         |
| 1D                                   | 22                    | 23                                 | 26                                 | 17                           |         |
| 1E                                   | 12                    | 13                                 | 12                                 | 11                           |         |
| 2                                    | 3                     | 6                                  | 1                                  | 3                            |         |
| Plasma creatinine (mg/dL)            | 1.23<br>[0.96 – 1.61] | 1.61 <sup>B</sup><br>[1.23 – 2.01] | 1.31 <sup>B</sup><br>[1.10 – 1.58] | 0.94<br>[0.80 – 1.10]        | <0.001  |
| eGFR (mL/min/1.73m <sup>2</sup> )    | 63 ± 25               | 47 ± 19 <sup>B</sup>               | 58 ± 17 <sup>B</sup>               | 84 ± 22                      | <0.001  |
| Plasma urea (mg/dL)                  | 20.7<br>[16.0 – 26.9] | 27.2 <sup>B</sup><br>[20.7 – 34.2] | 22.4 <sup>B</sup><br>[17.6 – 26.6] | 16.0<br>[13.4 – 19.9]        | <0.001  |

**Supplemental Table 4.** Baseline characteristics – continued.

|                                     | overall             | T1                                 | T2                                 | T3                    | p-value |
|-------------------------------------|---------------------|------------------------------------|------------------------------------|-----------------------|---------|
|                                     |                     | < 19.7                             | 19.7 – 31.6                        | >31.6                 |         |
| Copeptin (pmol/L)                   | 7.8<br>[4.5 – 13.7] | 9.1 <sup>B</sup><br>[4.9 – 16.5]   | 9.2 <sup>B</sup><br>[4.9 – 16.0]   | 5.9<br>[3.8 – 10.0]   | <0.001  |
| 24h urine volume (L)                | 2.3 ± 0.79          | 2.5 ± 0.81 <sup>B</sup>            | 2.3 ± 0.73 <sup>B</sup>            | 2.0 ± 0.72            | <0.001  |
| Urine urea (mg/dL)                  | 552<br>[409 – 697]  | 385 <sup>B</sup><br>[283 – 506]    | 540 <sup>B</sup><br>[448 – 641]    | 739<br>[619 – 910]    | <0.001  |
| Estimated protein intake (g/24h)    | 84 ± 25             | 81 ± 21                            | 85 ± 26                            | 86 ± 28               | 0.08    |
| Sodium excretion (mmol/24h)         | 145<br>[107 – 190]  | 140<br>[104 – 182]                 | 142<br>[113 – 198]                 | 153<br>[106 – 198]    | 0.29    |
| Urine-to-plasma urea ratio (mmol/L) | 24<br>[17 – 36]     | 14.8 <sup>B</sup><br>[11.6 – 17.2] | 24.2 <sup>B</sup><br>[22.0 – 27.8] | 43.1<br>[35.8 – 55.1] | <0.001  |
| Number of events                    | 145                 | 80 <sup>B</sup>                    | 56 <sup>B</sup>                    | 9                     | <0.001  |

Data presented as proportion of total population (%), mean ± SD or median [IQR] as appropriate. Differences between tertiles were assessed with Pearson's Chi-square for proportional data, one-way ANOVA for parametric data and Friedman's ANOVA for non-parametric data. Post-hoc comparisons with Bonferroni correction, where <sup>A</sup> signifies p<0.05, <sup>B</sup> p<0.001 compared to the third tertile. Abbreviations: BP, blood pressure; eGFR, estimated glomerular filtration rate; htTKV, height adjusted total kidney volume; NT, non-truncating; T, truncating. Urine urea was measured in an early morning fasting void. Protein intake was estimated in grams with the following formula: (urine urea excretion in 24 hours x 0.4667 x 0.06 + (0.031 x weight)) x 6.25.

**Supplemental Table 5.** Predictive value of the urine-to-plasma urea ratio as continuous variable and divided into tertiles for a combined kidney endpoint (n=706, N=145).

|         | As continuous variable |         | Tertile 3 | Tertile 2             | Tertile 1 |                       |        |
|---------|------------------------|---------|-----------|-----------------------|-----------|-----------------------|--------|
|         | Exp(B)                 | p-value | < 19.7    | 19.7 – 31.6           | Exp(B)    | p-value               |        |
| Model 1 | 0.43<br>(0.35 – 0.52)  | <0.001  | 1.0       | 6.76<br>(3.35 – 13.7) | <0.001    | 13.1<br>(6.55 – 26.1) | <0.001 |
| Model 2 | 0.40<br>(0.32 – 0.49)  | <0.001  | 1.0       | 7.15<br>(3.48 – 14.7) | <0.001    | 14.4<br>(7.02 – 29.5) | <0.001 |
| Model 3 | 0.69<br>(0.54 – 0.87)  | 0.002   | 1.0       | 2.29<br>(1.08 – 4.82) | 0.03      | 2.93<br>(1.33 – 6.45) | 0.008  |
| Model 4 | 0.69<br>(0.54 – 0.88)  | 0.003   | 1.0       | 2.47<br>(1.13 – 5.40) | 0.02      | 3.12<br>(1.37 – 7.14) | 0.007  |
| Model 5 | 0.70<br>(0.54 – 0.90)  | 0.006   | 1.0       | 2.56<br>(1.11 – 5.88) | 0.03      | 3.29<br>(1.37 – 7.93) | 0.008  |

Cox regression analysis. Reported are expected beta (Exp(B)) and (95% confidence interval for Exp(B)). The combined kidney endpoint defined as either start of kidney replacement therapy (dialysis or transplantation), reaching an eGFR below 15 mL/min/1.73m<sup>2</sup> or a decrease of eGFR of more than 40%. The exp(B) of the continuous urine-to-plasma urea ratio is presented per 10 units. Harrell's C statistic for model 5 was 0.8184 including, and 0.8108 excluding the continuous urine-to-plasma urea ratio (p = 0.03).

Model 1, crude

Model 2, adjustment for age and sex

Model 3, adjustment for age, sex and eGFR at baseline

Model 4, adjustment for age, sex, eGFR and *PKD* mutation (dummy 1: *PKD1* truncating, dummy 2 *PKD1* non-truncating, ref: *PKD2* and others),

Model 5, adjustment for age, sex, eGFR, *PKD* mutation and Mayo htTKV class (dummy 1: class 1B and 1C, dummy 2: class 1D and 1E, ref: class 1A and 2).

**Supplemental Figure 1.** Kidney function slopes of DIPAK cohort participants (n = 538) divided into risk groups according to Mayo htTKV class score (panel A), PKD mutation score (panel B) and urine-to-plasma urea ratio score (panel C). Dotted line indicates division between rapidly progressive disease and moderately progressive disease (respectively below or above -3.0 mL/min/1.73m<sup>2</sup> per year). Harrell's C-statistic of the total risk score was 0.72, which exceeded scores of A to C (A: 0.65, B: 0.63, C: 0.61, all p<0.05). A to C do not statistically differ from each other.

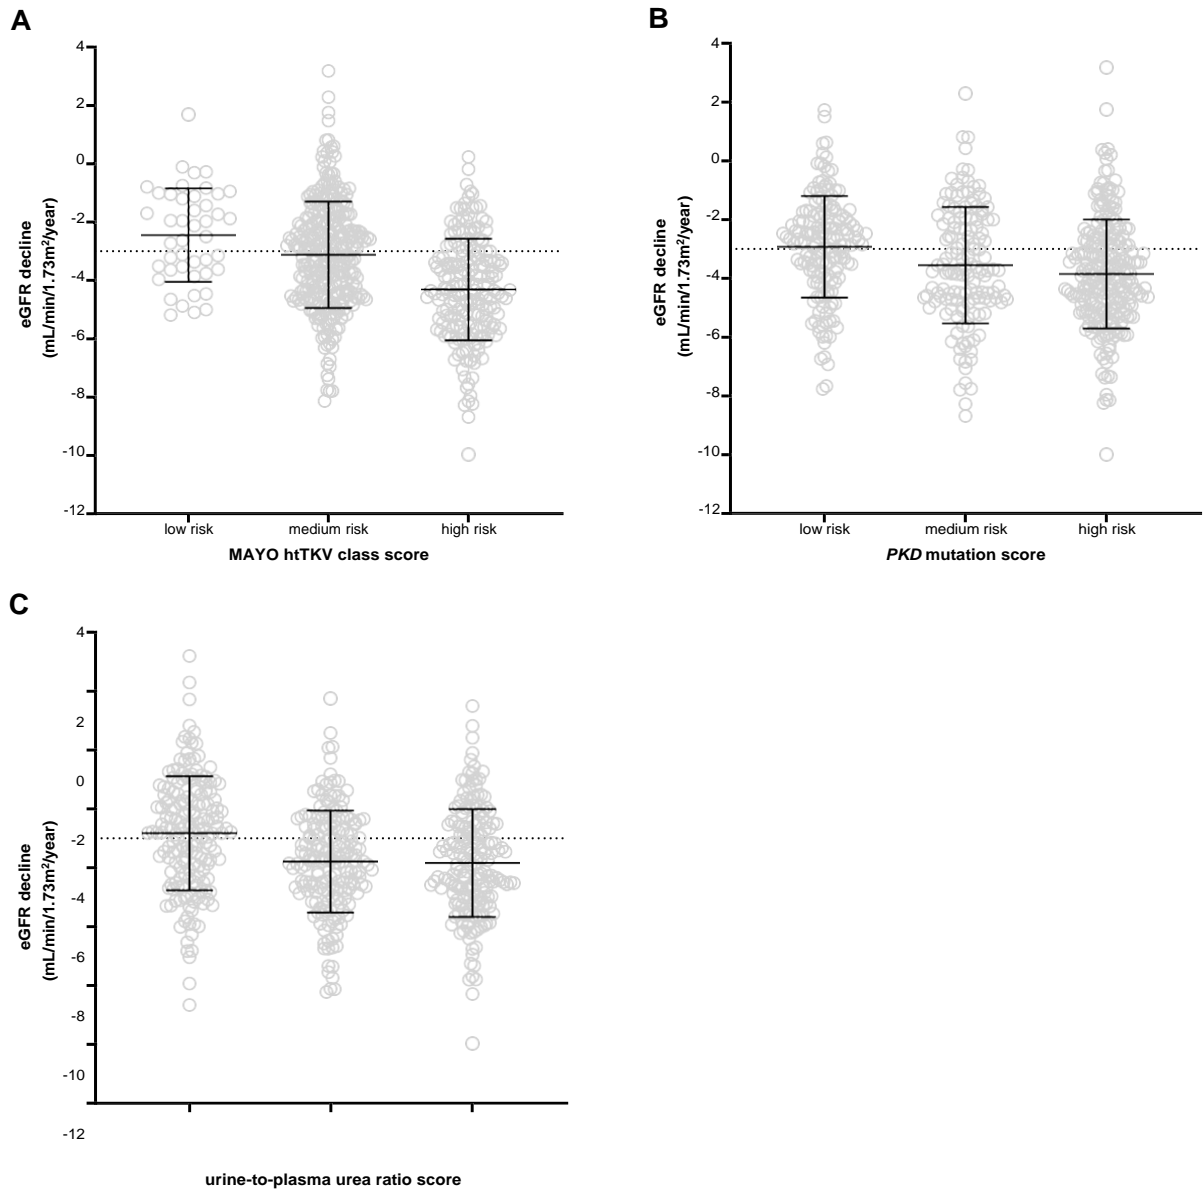

Supplement: CJN.10470620SupplementaryData.pdf [file CJN.10470620SupplementaryData.pdf]
